CORRECTION

# Correction: Iterative Usage of Fixed and Random Effect Models for Powerful and Efficient Genome-Wide Association Studies

The *PLOS Genetics* Staff

The following information is missing from the Funding section: ZZ was supported, in part, by an Emerging Research Issues Internal Competitive Grant from the Washington State University, College of Agricultural, Human, and Natural Resource Sciences, Agricultural Research Center project, the Endowment of Distinguished Professorship for Statistical Genomics, and a research project (No. 126593) from the Washington Grain Commission. The publisher apologizes for the error.

## Reference

1. Liu X, Huang M, Fan B, Buckler ES, Zhang Z (2016) Iterative Usage of Fixed and Random Effect Models for Powerful and Efficient Genome-Wide Association Studies. *PLoS Genet* 12(2): e1005767. doi:[10.1371/journal.pgen.1005767](https://doi.org/10.1371/journal.pgen.1005767) PMID: [26828793](https://pubmed.ncbi.nlm.nih.gov/26828793/)

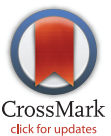

## OPEN ACCESS

**Citation:** The *PLOS Genetics* Staff (2016) Correction: Iterative Usage of Fixed and Random Effect Models for Powerful and Efficient Genome-Wide Association Studies. *PLoS Genet* 12(3): e1005957. doi:[10.1371/journal.pgen.1005957](https://doi.org/10.1371/journal.pgen.1005957)

**Published:** March 18, 2016

**Copyright:** © 2016 The PLOS Genetics Staff. This is an open access article distributed under the terms of the [Creative Commons Attribution License](https://creativecommons.org/licenses/by/4.0/), which permits unrestricted use, distribution, and reproduction in any medium, provided the original author and source are credited.
